# Supplementary material
Source: PubMed Central journal article supplement (PMC4946124)
Supplement: ijmsv13p0533s1.pdf [file ijmsv13p0533s1.pdf]

**Figure S1**

**A**

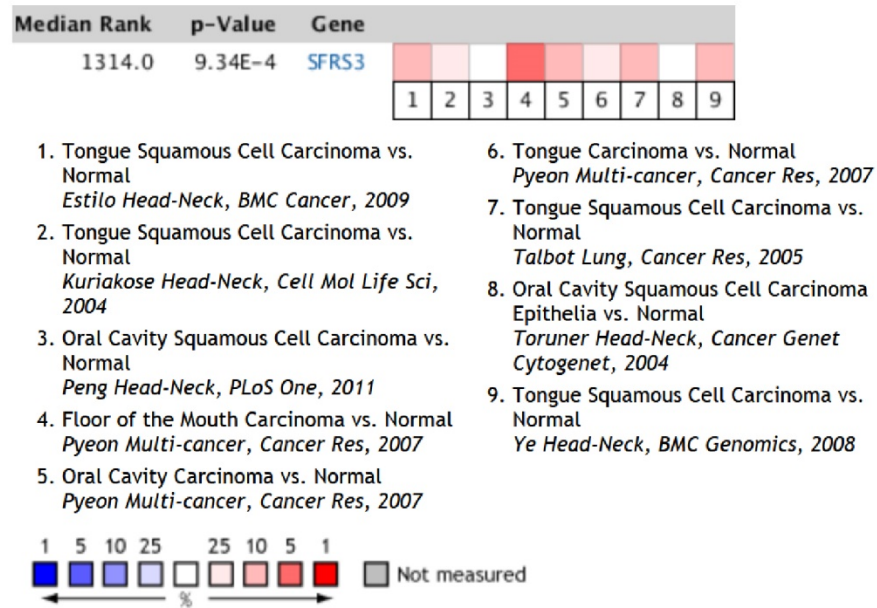

**B**

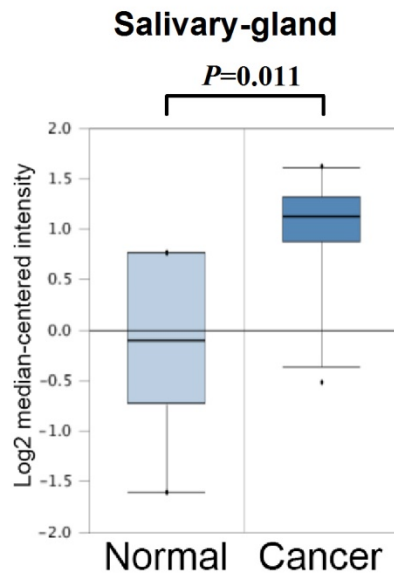

**Figure S1.** Expression of SRSF3 in oral cancer vs normal control according to analyses in Oncomine cancer microarray database. (A) A meta-analysis of the expression of SRSF3 in combined nine analyses of oral squamous cell carcinoma vs normal control samples. (B) Expression of SRSF3 in a study of salivary gland cancer vs normal control.
